# Supplementary material
Source: Springer Nature journal article supplement (https://www.springermedizin.de/resource/supplementary/13024_2008_61_MOESM7_ESM.pdf/9643294)

R:L ratio of SNCA/HPRT expression

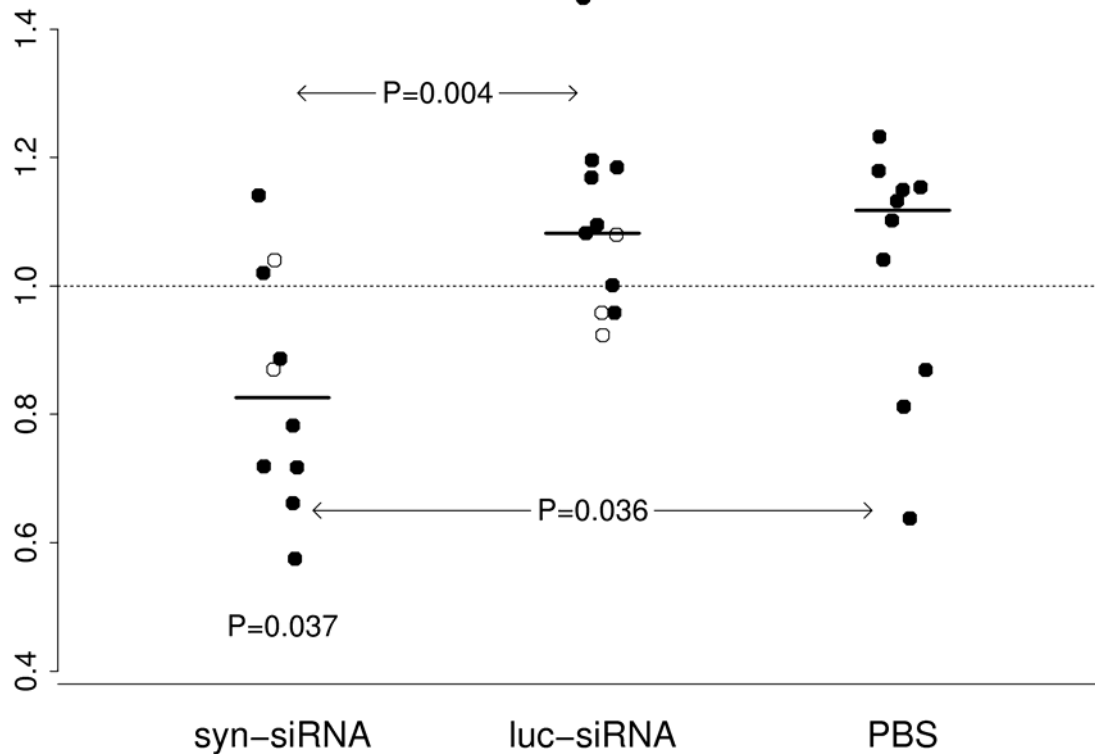

Supplement: MOESM7 [file 9643294]
